# Supplementary material for: Using Smartphones and Health Apps to Change and Manage Health Behaviors: A Population-Based Survey
Source: PubMed Central journal article supplement (PMC5399221; doi:10.2196/jmir.6838), 2017-04-05
Supplement: jmir_v19i4e101_app1.pdf [file jmir_v19i4e101_app1.pdf]

Table 3. Multivariate associations of behaviors targeted by the apps and app characteristics with smoking among health app users (n=521).

| Covariates                     |                           | OR <sup>a</sup> (95% CI) | P    |
|--------------------------------|---------------------------|--------------------------|------|
|                                | Intercept                 | 0.28                     | .40  |
|                                | Female (vs male)          | 0.83 (0.53-1.29)         | .41  |
|                                | Age in years              | 1.01 (0.99-1.03)         | .52  |
| Behaviors targeted by the apps |                           |                          |      |
|                                | Regular physical activity | 14.44 (7.64-27.29)       | .001 |
|                                | Smoking cessation         | 0.93 (0.57-1.52)         | .77  |
|                                | Healthy diet              | 0.67 (0.41-1.09)         | .11  |
|                                | Weight loss               | 1.26 (0.74-2.15)         | .40  |
|                                | Medication adherence      | 2.03 (1.00-4.12)         | .05  |
|                                | Blood pressure control    | 0.67 (0.28-1.61)         | .37  |
|                                | Blood sugar control       | 1.01 (0.26-3.91)         | .99  |
| App characteristics            |                           |                          |      |
|                                | Providing information     | 0.96 (0.59-1.56)         | .87  |
|                                | Prompting motivation      | 0.97 (0.60-1.58)         | .90  |
|                                | Planning                  | 0.67 (0.43-1.05)         | .08  |
|                                | Reminding                 | 1.13 (0.71-1.81)         | .60  |
|                                | Feedback or monitoring    | 0.55 (0.29-1.04)         | .07  |

<sup>a</sup>OR: odds ratio.

Table 4. Multivariate associations of behaviors targeted by the apps and app characteristics with physical activity among health app users (n=521).

| Covariates                     |                           | OR <sup>a</sup> (95% CI) | P                  |
|--------------------------------|---------------------------|--------------------------|--------------------|
|                                | Intercept                 | 3.33                     | .03                |
|                                | Female (vs male)          | 0.88 (0.59-1.30)         | .52                |
|                                | Age in years              | 0.97 (0.95-0.99)         | .001               |
| Behaviors targeted by the apps |                           |                          |                    |
|                                | Regular physical activity | 0.54 (0.31-0.95)         | .03                |
|                                | Smoking cessation         | 3.01 (1.96-4.65)         | <.001 <sup>b</sup> |
|                                | Healthy diet              | 1.65 (1.07-2.55)         | .02                |
|                                | Weight loss               | 0.48 (0.30-0.78)         | .003               |
|                                | Medication adherence      | 1.05 (0.54-              | .90                |

|                            |                        |                  |      |
|----------------------------|------------------------|------------------|------|
|                            |                        | 2.04)            |      |
|                            | Blood pressure control | 0.71 (0.33-1.53) | .39  |
|                            | Blood sugar control    | 1.99 (0.57-6.97) | .28  |
| <b>App characteristics</b> |                        |                  |      |
|                            | Providing information  | 0.91 (0.60-1.39) | .67  |
|                            | Prompting motivation   | 0.87 (0.56-1.33) | .51  |
|                            | Planning               | 1.51 (1.02-2.24) | .04  |
|                            | Reminding              | 1.12 (0.73-1.71) | .60  |
|                            | Feedback or monitoring | 2.15 (1.23-3.78) | .007 |

<sup>a</sup>OR: odds ratio.

<sup>b</sup>still significant after correction for multiplicity

Table 5. Multivariate associations of behaviors targeted by the apps and app characteristics with low fat diet among health app users (n=521).

| <b>Covariates</b>                     | <b>OR<sup>a</sup> (95% CI)</b> | <b>P</b>           |
|---------------------------------------|--------------------------------|--------------------|
| Intercept                             | 1.09                           | .88                |
| Female (vs male)                      | 1.16 (0.79-1.71)               | .44                |
| Age in years                          | 0.99 (0.97-1.01)               | .14                |
| <b>Behaviors targeted by the apps</b> |                                |                    |
| Regular physical activity             | 0.81 (0.46-1.40)               | .45                |
| Smoking cessation                     | 2.34 (1.52-3.60)               | <.001 <sup>b</sup> |
| Healthy diet                          | 1.83 (1.18-1.83)               | .007               |
| Weight loss                           | 0.31 (0.19-0.50)               | <.001 <sup>b</sup> |
| Medication adherence                  | 1.14 (0.58-2.23)               | .71                |
| Blood pressure control                | 1.53 (0.73-3.23)               | .26                |
| Blood sugar control                   | 1.98 (0.55-7.11)               | .30                |
| <b>App characteristics</b>            |                                |                    |
| Providing information                 | 1.27 (0.83-                    | .27                |

|  |                        |                  |     |
|--|------------------------|------------------|-----|
|  |                        | 1.92)            |     |
|  | Prompting motivation   | 1.17 (0.77-1.77) | .48 |
|  | Planning               | 1.45 (0.99-2.14) | .06 |
|  | Reminding              | 0.93 (0.61-1.41) | .73 |
|  | Feedback or monitoring | 1.66 (0.97-2.84) | .06 |

<sup>a</sup>OR: odds ratio.

<sup>b</sup>still significant after correction for multiplicity

Table 6. Multivariate associations of behaviors targeted by the apps and app characteristics with balanced diet among health app users (n=521).

| Covariates                            |                           | OR <sup>a</sup> (95% CI) | P                  |
|---------------------------------------|---------------------------|--------------------------|--------------------|
|                                       | Intercept                 | 1.54                     | .45                |
|                                       | Female (vs male)          | 1.02 (0.69-1.52)         | .91                |
|                                       | Age in years              | 0.99 (0.97-1.01)         | .44                |
| <b>Behaviors targeted by the apps</b> |                           |                          |                    |
|                                       | Regular physical activity | 1.11 (0.63-1.95)         | .73                |
|                                       | Smoking cessation         | 2.16 (1.38-3.39)         | .001               |
|                                       | Healthy diet              | 1.97 (1.26-3.09)         | .003               |
|                                       | Weight loss               | 0.32 (0.20-0.52)         | <.001 <sup>b</sup> |
|                                       | Medication adherence      | 1.52 (0.75-3.10)         | .25                |
|                                       | Blood pressure control    | 0.72 (0.34-1.50)         | .38                |
|                                       | Blood sugar control       | 1.31 (0.36-4.77)         | .69                |
| <b>App characteristics</b>            |                           |                          |                    |
|                                       | Providing information     | 0.88 (0.57-1.35)         | .56                |
|                                       | Prompting motivation      | 1.01 (0.66-1.56)         | .96                |
|                                       | Planning                  | 1.35 (0.91-2.02)         | .14                |
|                                       | Reminding                 | 1.27 (0.82-              | .28                |

|  |                        |                  |     |
|--|------------------------|------------------|-----|
|  |                        | 1.95)            |     |
|  | Feedback or monitoring | 1.55 (0.88-2.73) | .13 |

<sup>a</sup>OR: odds ratio.

<sup>b</sup>still significant after correction for multiplicity

Table 7. Multivariate associations of behaviors targeted by the apps and app characteristics with adherence to doctor's advice among health app users (n=521).

| <b>Covariates</b>                     | <b>OR<sup>a</sup> (95% CI)</b> | <b>P</b> |
|---------------------------------------|--------------------------------|----------|
|                                       |                                |          |
| Intercept                             | 6.73                           | .02      |
| Female (vs male)                      | 0.83 (0.46-1.49)               | .53      |
| Age in years                          | 0.99 (0.96-1.02)               | .43      |
| <b>Behaviors targeted by the apps</b> |                                |          |
| Regular physical activity             | 1.72 (0.67-4.42)               | .26      |
| Smoking cessation                     | 3.07 (1.40-6.72)               | .005     |
| Healthy diet                          | 1.76 (0.84-3.65)               | .13      |
| Weight loss                           | 1.02 (0.49-2.15)               | .96      |
| Medication adherence                  | 0.81 (0.31-2.15)               | .68      |
| Blood pressure control                | 1.78 (0.49-6.43)               | .38      |
| Blood sugar control                   | 1.62 (0.18-14.63)              | .67      |
| <b>App characteristics</b>            |                                |          |
| Providing information                 | 1.05 (0.56-1.98)               | .88      |
| Prompting motivation                  | 0.60 (0.32-1.13)               | .11      |
| Planning                              | 1.29 (0.72-2.34)               | .40      |
| Reminding                             | 1.09 (0.57-2.07)               | .80      |
| Feedback or monitoring                | 5.94 (1.37-25.66)              | .02      |

<sup>a</sup>OR: odds ratio.
